# Supplementary material
Source: ML conference proceedings conference paper supplement (https://proceedings.mlr.press/v31/sharpnack13b.html)
Supplement: Supplementary file 1 [file sharpnack13b-supp.pdf]

## A Appendix

### A.1 Proofs in Section 2

*Proof of Lemma 2.* To expedite the proof, we express the LR statistics in terms of the sufficient statistics  $\mathbf{y}_0 = \frac{1}{|\bar{C}|} \sum_{i \in C} \mathbf{y}_i \sim N(\beta_0, \sigma_0^2)$  and  $\mathbf{y}_1 = \frac{1}{|C|} \sum_{i \in \bar{C}} \mathbf{y}_i \sim N(\beta_1, \sigma_1^2)$  for  $\sigma_0 = \sigma/\sqrt{|C|}$  and  $\sigma_1 = \sigma/\sqrt{|\bar{C}|}$ . Then, we obtain

$$2 \log \Lambda_C(\mathbf{y}) = \frac{1}{\sigma_0^2} (\mathbf{y}_0 - \hat{\beta})^2 + \frac{1}{\sigma_1^2} (\mathbf{y}_1 - \hat{\beta})^2$$

where  $\hat{\beta} = \frac{\sigma_1^2}{\sigma_0^2 + \sigma_1^2} \mathbf{y}_0 + \frac{\sigma_0^2}{\sigma_0^2 + \sigma_1^2} \mathbf{y}_1$  is the MLE under  $H_0$ . (The likelihood under the alternative balances with the normalizing constant of the null likelihood.) Thus,

$$\begin{aligned} 2 \log \Lambda_C(\mathbf{y}) &= \frac{1}{\sigma_0^2} \left( \frac{\sigma_0^2}{\sigma_0^2 + \sigma_1^2} (\mathbf{y}_0 - \mathbf{y}_1) \right)^2 \\ &\quad + \frac{1}{\sigma_1^2} \left( \frac{\sigma_1^2}{\sigma_0^2 + \sigma_1^2} (\mathbf{y}_0 - \mathbf{y}_1) \right)^2 \\ &= \frac{(\mathbf{y}_0 - \mathbf{y}_1)^2}{\sigma_0^2 + \sigma_1^2} = \frac{1}{\sigma^2} \frac{|C||\bar{C}|}{|V|} (\mathbf{y}_0 - \mathbf{y}_1)^2 \\ &= \frac{1}{\sigma^2} \frac{|V|}{|C||\bar{C}|} \left( \frac{|\bar{C}|}{|V|} \sum_{v \in C} \mathbf{y}_v - \frac{|C|}{|V|} \sum_{v \in \bar{C}} \mathbf{y}_v \right)^2 \\ &= \frac{1}{\sigma^2} \frac{|V|}{|C||\bar{C}|} \left( \sum_{v \in C} \mathbf{y}_v - \frac{|C|}{|V|} \sum_{v \in V} \mathbf{y}_v \right)^2 \\ &= \frac{1}{\sigma^2} \frac{|V|}{|C||\bar{C}|} \left( \sum_{v \in C} \tilde{\mathbf{y}}_v \right)^2. \end{aligned} \quad (11)$$

Now we let  $\mathbf{x} = \mathbf{1}_C$ , making the statistic above

$$2\sigma^2 \log \Lambda_C(\mathbf{y}) = \frac{\mathbf{x}^\top \tilde{\mathbf{y}} \tilde{\mathbf{y}} \mathbf{x}}{\mathbf{x}^\top \mathbf{K} \mathbf{x}} \text{ and } \frac{|\partial C||V|}{|C||\bar{C}|} = \frac{\mathbf{x}^\top \mathbf{L} \mathbf{x}}{\mathbf{x}^\top \mathbf{K} \mathbf{x}}.$$

The result now follows by considering all the indicator functions corresponding to the sets in  $\mathcal{C}$ .  $\square$

*Proof of Remark 4.* First we notice that (8) is equivalent to

$$\inf_{\mathbf{x} \in \mathbb{R}} -\mathbf{x}^\top \tilde{\mathbf{y}} \text{ s.t. } \mathbf{x}^\top \mathbf{L} \mathbf{x} \leq \rho, \|\mathbf{x}\| \leq 1$$

because  $\mathbf{x}^\top \mathbf{L} \mathbf{x}$  and  $\mathbf{x}^\top \tilde{\mathbf{y}}$  are invariant under changes in  $\mathbf{1}^\top \mathbf{x}$ . This admits the Lagrangian (for parameters  $\nu_0, \nu_1 > 0$ ),

$$-\mathbf{x}^\top \tilde{\mathbf{y}} + \nu_0 (\mathbf{x}^\top \mathbf{L} \mathbf{x} - \rho) + \nu_1 (\mathbf{x}^\top \mathbf{x} - 1)$$

which is minimized for fixed  $\nu_0, \nu_1$  at  $\mathbf{x} = -\frac{1}{2}[\nu_0 \mathbf{L} + \nu_1 \mathbf{I}]^{-1} \tilde{\mathbf{y}}$  (which confirms Slater's condition). Hence, the dual program is

$$\sup_{\nu_0, \nu_1 \geq 0} -\nu_0 \rho - \nu_1 - \frac{1}{2} \tilde{\mathbf{y}}^\top [\nu_0 \mathbf{L} + \nu_1 \mathbf{I}]^{-1} \tilde{\mathbf{y}} + \frac{1}{4} \tilde{\mathbf{y}}^\top [\nu_0 \mathbf{L} + \nu_1 \mathbf{I}]^{-1} \tilde{\mathbf{y}} \quad \square$$

### A.2 Proofs in Section 3

*Proof of Theorem 5 (1).* Let the true  $C \in \mathcal{C}$  be known. The performance of the optimal test with  $C$  known, which by the Neyman-Pearson Lemma is based on  $2 \log \Lambda_C(\mathbf{y})$ , bounds the performance of that with  $C$  unknown. To this end, note that, under  $H_0$ , the LR statistic (6) has a  $\chi_1^2$ , while under the alternative  $H_1^C$  it has a  $\chi_1^2(\lambda)$  distribution with non-centrality parameter

$$\lambda = \frac{\delta^2}{\sigma^2} \frac{|C||\bar{C}|}{|V|} = \frac{\eta^2}{\sigma^2},$$

which is the square of the SNR. For fixed  $C$ , asymptotically indistinguishable of  $H_0$  versus  $H_1^C$  follows by considering any threshold and noticing that the associated type 1 and type 2 errors are non-vanishing under the SNR scaling assumed in the statement. Since the risk of testing  $H_0$  versus  $H_1$  is no smaller than the risk of testing  $H_0$  versus  $H_1^C$ , the result follows.  $\square$

We remark that the proof of the previous result shows that when distinguishing  $H_0$  from  $H_1^C$ , the power of the test is maximal when  $|C| = |\bar{C}|$  for a fixed value of the SNR.

*Proof of Theorem 5 (2).* We will begin by constructing from our set,  $\mathcal{C}'$ , a new set,  $\mathcal{S}$ , of clusters which are difficult to distinguish in the sense that the Bayes risk for the uniform prior over those in the alternative is bounded away from 0. Enumerate  $\mathcal{C}'$  such that  $\mathcal{C}' = \{C_i\}_{i=1}^{|\mathcal{C}'|}$ . We will build  $\mathcal{S}$  by unioning  $k$  elements of  $\mathcal{C}'$ , then draw  $S, S'$  uniformly from  $\mathcal{S}$ . Specifically, let  $k = \lfloor \sqrt{|\mathcal{C}'|} \rfloor$  (recall that  $c = |C|, \forall C \in \mathcal{C}'$ ), and let  $K, K'$  be independent uniform samples without replacement of  $k$  elements from  $\{1, \dots, |\mathcal{C}'|\}$ . Then let  $S = \cup_{i \in K} C_i$  and  $S' = \cup_{i \in K'} C_i$ . Notice that  $kc = |S| \leq n/2$  for  $n$  large enough.

$$\begin{aligned} \frac{|\partial S|}{|S||\bar{S}|} &\leq \frac{k \max_{C \in \mathcal{C}'} |\partial C|}{kc(n - kc)} \\ &\leq \frac{n - c}{n - kc} \max_{C \in \mathcal{C}'} \frac{|\partial C|}{c(n - c)} \leq 2 \frac{\rho}{2} = \rho \end{aligned}$$

Notice that the risk can be bounded by

$$\begin{aligned} &\sup_{\beta \in \Theta_0} \mathbb{E}_\beta T(\mathbf{y}) + \sup_{\beta \in \Theta_1} \mathbb{E}_\beta [1 - T(\mathbf{y})] \\ &\geq \mathbb{E}_{\beta=0} T(\mathbf{y}) + \frac{1}{|S|} \sum_{S \in \mathcal{S}} \mathbb{E}_{\beta^S} [1 - T(\mathbf{y})] = R^* \end{aligned}$$

where  $\beta^S = \eta \sqrt{\frac{n}{|S||S'|}} \mathbf{1}_S$  and  $S \subseteq \mathcal{C}$ . Then by Proposition 3.2 in [1],

$$R^* \geq 1 - \frac{1}{2} \sqrt{\mathbb{E} \exp \left\{ \frac{\eta^2}{\sigma^2} Z \right\}} - 1$$

where

$$Z = \frac{n|S \cap S'|}{\sqrt{|S||S'||S'|}}$$

for  $S, S'$  drawn independently uniformly from  $\mathcal{S}$ . Notice that

$$\frac{n}{\sqrt{|S'||S'|}} \leq 2$$

Hence,

$$Z \leq 2 \frac{|S \cap S'|}{\sqrt{|S||S'|}} = 2 \frac{|K \cap K'|}{\sqrt{|K||K'|}}$$

And we have that

$$R^* \geq 1 - \frac{1}{2} \sqrt{\mathbb{E} e^{\frac{2\eta^2}{k\sigma^2} |K \cap K'|}} - 1$$

Hence, we can apply Proposition 3.4 from [1] (by substituting  $\mu \leftarrow \eta\sqrt{2}/(\sigma\sqrt{k})$ ) and determine that  $R^* > \delta$  if

$$\frac{\eta\sqrt{2}}{\sigma\sqrt{k}} \leq \sqrt{\log \left( 1 + \frac{|\mathcal{C}'| \log(1 + 4(1 - \delta)^2)}{k^2} \right)}$$

Because  $k^2 \asymp |\mathcal{C}'|$  we have asymptotic indistinguishability if  $\eta/\sigma = o(\sqrt{k}) = o(|\mathcal{C}'|^{1/4})$ . For some explanation for the choice of  $k$  the term  $k \log(1 + |\mathcal{C}'|/k^2)$  is largest when  $k^2 \asymp |\mathcal{C}'|$ .  $\square$

*Proof of Lemma 7.* Without loss of generality, let  $\mathbf{y} \sim \mathcal{N}(\mathbf{0}, \mathbf{I})$ . We recall that, since  $G$  is connected, the combinatorial Laplacian  $\mathbf{L}$  is symmetric, its smallest eigenvalue is zero and the remaining eigenvalues are positive. By the spectral theorem, we can write  $\mathbf{L} = \mathbf{U}\mathbf{\Lambda}\mathbf{U}^\top$ , where  $\mathbf{\Lambda}$  is a  $(n-1) \times (n-1)$  diagonal matrix containing the positive eigenvalues of  $\mathbf{L}$  in increasing order and the columns of the  $n \times (n-1)$  matrix  $\mathbf{U}$  are the associated eigenvectors. Then, since each vector  $\mathbf{x} \in \mathbb{R}^n$  with  $\mathbf{1}^\top \mathbf{x} = 0$  can be written as  $\mathbf{U}\mathbf{z}$  for a unique vector  $\mathbf{z} \in \mathbb{R}^{n-1}$ , we have

$$\begin{aligned} \mathcal{X} &= \{ \mathbf{x} \in \mathbb{R}^n : \mathbf{x}^\top \mathbf{L}\mathbf{x} \leq \rho, \mathbf{x}^\top \mathbf{x} = 1, \mathbf{1}^\top \mathbf{x} \leq 0 \} \\ &= \{ \mathbf{U}\mathbf{z} : \mathbf{z} \in \mathbb{R}^{n-1}, \\ &\quad \mathbf{z}^\top \mathbf{U}^\top \mathbf{L}\mathbf{U}\mathbf{z} \leq \rho, \mathbf{z}^\top \mathbf{U}^\top \mathbf{U}\mathbf{z} \leq 1 \} \\ &= \{ \mathbf{U}\mathbf{z} : \mathbf{z} \in \mathbb{R}^{n-1}, \frac{1}{\rho} \mathbf{z}^\top \mathbf{\Lambda}\mathbf{z} \leq 1, \mathbf{z}^\top \mathbf{z} \leq 1 \}, \end{aligned}$$

where in the third identity we have used the fact that  $\mathbf{U}^\top \mathbf{U} = \mathbf{I}_{n-1}$ . Letting  $\mathcal{Z} = \{ \mathbf{z} \in \mathbb{R}^{n-1} : \frac{1}{\rho} \mathbf{z}^\top \mathbf{\Lambda}\mathbf{z} \leq 1, \mathbf{z}^\top \mathbf{z} \leq 1 \}$ , we see that

$$\sup_{\mathbf{x} \in \mathcal{X}} \mathbf{x}^\top \mathbf{y} = \sup_{\mathbf{z} \in \mathcal{Z}} \mathbf{z}^\top \mathbf{U}^\top \mathbf{y} \stackrel{d}{=} \sup_{\mathbf{z} \in \mathcal{Z}} \mathbf{z}^\top \boldsymbol{\xi},$$

where  $\boldsymbol{\xi} \sim N(0, \mathbf{I}_{n-1})$  and  $\stackrel{d}{=}$  denotes equality in distribution.

Next, we show that the set  $\mathcal{Z}$ , which is the intersection of an ellipsoid with the unit ball in  $\mathbb{R}^{n-1}$ , is contained in an enlarged ellipsoid. The supremum of the Gaussian process  $\mathbf{z}^\top \boldsymbol{\xi}$  over  $\mathcal{Z}$  will then be bounded by the supremum of the same process over this larger but simpler set, which we will be able to bound using directly a result from [38] based on chaining. To this end, let  $\mathbf{A} = \frac{1}{\rho} \mathbf{\Lambda} = \text{diag}\{a_i\}_{i=1}^{n-1}$  and  $d = \max\{j : a_j < 1\}$ . For a vector  $\mathbf{z} \in \mathbb{R}^{n-1}$  set  $\mathbf{z}_1 = \mathbf{z}_{[d]}$ ,  $\mathbf{z}_2 = \mathbf{z}_{[n-1] \setminus [d]}$ , and  $\mathbf{A}_2 = \text{diag}\{a_i\}_{i>d}$ . Then, we observe the following chain of implications, holding for vectors  $\mathbf{z} \in \mathbb{R}^{n-1}$ :

$$\begin{aligned} \|\mathbf{z}\| \leq 1, \mathbf{z}^\top \mathbf{A}\mathbf{z} \leq 1 &\Rightarrow \|\mathbf{z}_1\| \leq 1, \sum_{i>d} a_i \mathbf{z}_i^2 \leq 1 \\ &\Rightarrow \mathbf{z}_1^\top \mathbf{z}_1 + \mathbf{z}_2^\top \mathbf{A}_2 \mathbf{z}_2 \leq 2 \Rightarrow \sum_i \frac{\max\{1, a_i\}}{2} \mathbf{z}_i^2 \leq 1. \end{aligned}$$

Hence, we have the bound

$$\mathbb{E} \sqrt{\hat{s}} \leq \mathbb{E} \sup_{\mathbf{z} \in \mathbb{R}^{n-1}} \mathbf{z}^\top \boldsymbol{\xi} \text{ s.t. } \sum_i 2 \max\{1, a_i\} \mathbf{z}_i^2 \leq 1.$$

Recalling that  $a_i = \frac{\lambda_{i+1}}{\rho}$ , for  $i = 1, \dots, n-1$ , where  $\lambda_{i+1}$  is the  $(i+1)$ th eigenvalue of  $\mathbf{L}$ , by Proposition 2.2.1 in [38] the right hand side of the previous expression is bounded by  $\sqrt{2 \sum_{i>1} \min\{1, \rho \lambda_i^{-1}\}}$ .  $\square$

*Supplement to the proof of Theorem 6.* The following property of Gaussian processes effectively reduces the study of their supremum to the study of its expectation. It was established by [7] and [10] and can be found in [22].

**Lemma 14.** *Consider a Gaussian process  $\{Z_t\}_{t \in \mathcal{U}}$  where  $\mathcal{U}$  is compact with respect to metric*

$$d(s, t) = (\mathbb{E}(Z_s - Z_t)^2)^{1/2}, \quad s, t, \in \mathcal{U},$$

and let  $\sigma^2 \geq \sup_{t \in \mathcal{U}} \mathbb{E} Z_t^2$ . We have that with probability at least  $1 - \delta$

$$\left| \sup_{t \in \mathcal{U}} Z_t - \mathbb{E} \sup_{t \in \mathcal{U}} Z_t \right| < \sqrt{2\sigma^2 \log \frac{2}{\delta}}.$$

Notice that the natural distance is given by  $d(\mathbf{x}_0, \mathbf{x}_1) = (\mathbb{E}((\mathbf{x}_0 - \mathbf{x}_1)^\top \mathbf{y})^2)^{1/2} = \sigma \|\mathbf{x}_0 - \mathbf{x}_1\|$  for  $\mathbf{x}_0, \mathbf{x}_1 \in \mathcal{X}$ .  $\square$

### A.3 Proof in Section 4

*Proof of Corollary 11 (a).* The study of the spectra of trees really began in earnest with the work of [12]. Notably, it became apparent that tree have eigenvalues with high multiplicities, particularly the eigenvalue 1.

[30] gave a tight bound on the algebraic connectivity of balanced binary trees (BBT). They found that for a BBT of depth  $\ell$ , the reciprocal of the smallest eigenvalue ( $\lambda_2^{(\ell)}$ ) is

$$\begin{aligned} \frac{1}{\lambda_2^{(\ell)}} &\leq 2^\ell - 2\ell + 2 - \frac{2^\ell - \sqrt{2}(2\ell - 1 - 2^{\ell-1})}{2^\ell - 1 - \sqrt{2}(2^{\ell-1} - 1)} \\ &\quad + (3 - 2\sqrt{2} \cos(\frac{\pi}{2\ell - 1}))^{-1} \quad (12) \\ &\leq 2^\ell + 105I\{\ell < 4\} \end{aligned}$$

[32] gave a more exact characterization of the spectrum of a balanced binary tree, providing a decomposition of the Laplacian's characteristic polynomial. Specifically, the characteristic polynomial of  $\mathbf{L}$  is given by

$$\det(\lambda \mathbf{I} - \mathbf{L}) = p_1^{2^{\ell-2}}(\lambda) p_2^{2^{\ell-3}}(\lambda) \dots p_{\ell-3}^{2^2}(\lambda) p_{\ell-2}^2(\lambda) p_{\ell-1}(\lambda) s_\ell(\lambda) \quad (13)$$

where  $s_\ell(\lambda)$  is a polynomial of degree  $\ell$  and  $p_i(\lambda)$  are polynomials of degree  $i$  with the smallest root satisfying the bound in (12) with  $\ell$  replaced with  $i$ . In [33], they extended this work to more general balanced trees.

By (13) we know that at most  $\ell + (\ell - 1) + (\ell - 2)2 + \dots + (\ell - j)2^{j-1} \leq \ell 2^j$  eigenvalues have reciprocals larger than  $2^{\ell-j} + 105I\{j < 4\}$ . Let  $k = \max\{\lceil \frac{\ell}{c} 2^{\ell(1-\alpha)} \rceil, 2^3\}$ , then we have ensured that at most  $k$  eigenvalues are smaller than  $\rho$ . For  $n$  large enough

$$\begin{aligned} \sum_{i>1} \min\{1, \rho \lambda_i^{-1}\} &\leq k + \rho \sum_{j>\log k}^{\ell} \ell 2^j 2^{\ell-j} \\ &= k + \ell(\ell - \log k)n\rho = O(n^{1-\alpha}(\log n)^2) \end{aligned}$$

□

*Proof of Corollary 11 (b).* We will construct  $C'$  in Theorem 5 (b) from subtrees of size  $4cn^\alpha$ . Let  $C$  be such a subtree, then for  $n$  large enough

$$\begin{aligned} 1 - 4cn^{\alpha-1} &\geq \frac{1 - cn^{\alpha-1}}{2} \\ \Rightarrow \frac{n|\partial C|}{|C||\bar{C}|} &= [4cn^\alpha(1 - 4cn^{\alpha-1})]^{-1} \\ &\leq \frac{1}{2}[cn^\alpha(1 - cn^{\alpha-1})]^{-1} = \frac{rho}{2} \end{aligned}$$

Hence the conditions of Theorem 5 (b) hold with  $|C'| = n/(4cn^\alpha) \asymp n^{1-\alpha}$  □

*Proof of Corollary 12 (a).* By a simple Fourier analysis (see [36]), we know that the Laplacian eigenvalues are  $2(2 - \cos(2\pi i_1/p) - \cos(2\pi i_2/p))$  for all  $i_1, i_2 \in [p]$ .

Let us denote the  $p^2$  eigenvalues as  $\lambda_{(i_1, i_2)}$  for  $i_1, i_2 \in [p]$ . Notice that for  $i \in [p]$ ,  $|\{(i_1, i_2) : i_1 \vee i_2 = i\}| \leq 2i$ . For simplicity let  $p$  be even. We know that if  $i_1 \vee i_2 \leq p/2$  then  $\lambda_{(i_1, i_2)} = 2 - \cos(2\pi i_1/p) - \cos(2\pi i_2/p) \geq 1 - \cos(2\pi(i_1 \vee i_2)/p)$ . Thus,

$$\begin{aligned} &\sum_{(i_1, i_2) \neq (1, 1) \in [p]^2} 1 \wedge \frac{\rho}{\lambda_{(i_1, i_2)}} \\ &\leq 2 \sum_{i \in [p/2]} 2i \left( 1 \wedge \frac{\rho}{1 - \cos(2\pi i/p)} \right) \\ &\leq \rho \frac{p^2}{2} \frac{2}{p} \sum_{i \in [p/2]} 2 \frac{i/p}{1 - \cos(2\pi i/p)} \\ &\leq \rho \frac{p^2}{2} \int_{1/p}^{1/2} \frac{xdx}{1 - \cos(2\pi x)} \\ &\leq \rho \frac{p^2}{2} \left. \frac{\log(\sin(\pi x)) - \pi x \cot(\pi x)}{2\pi^2} \right|_{1/p}^{1/2} \\ &= \rho \frac{p^2}{2} \frac{(\pi/p) \cot(\pi/p) - \log(\sin(\pi/p))}{2\pi^2} \end{aligned}$$

While we can use the first order expansion of the terms to obtain the behavior,

$$\begin{aligned} (\pi/p) \cot(\pi/p) &= 1 + o(\pi/p) \\ -\log(\sin(\pi/p)) &= -\log(\pi/p) - \log(1 + o(1)) \end{aligned}$$

so we arrive at the following,

$$\begin{aligned} &\sum_{(i_1, i_2) \neq (1, 1) \in [p]^2} 1 \wedge \frac{\rho}{\lambda_{(i_1, i_2)}} \\ &\leq \rho \frac{p^2}{4\pi^2} (1 + \log(p/\pi) + o(1)) \\ &= \frac{C}{4\pi^2} p^{1+\beta} (1 + \log(p/\pi) + o(1)) \\ &= O(n^{(1+\beta)/2} \log(p)) \end{aligned}$$

which in conjunction with (9) completes our proof. □

*Proof of Corollary 13 (a).* The Kronecker product of two matrices  $\mathbf{A}, \mathbf{B} \in \mathbb{R}^{n \times n}$  is defined as  $\mathbf{A} \otimes \mathbf{B} \in \mathbb{R}^{(n \times n) \times (n \times n)}$  such that  $(\mathbf{A} \otimes \mathbf{B})_{(i_1, i_2), (j_1, j_2)} = A_{i_1, j_1} B_{i_2, j_2}$ . Some matrix algebra shows that if  $H_1$  and  $H_2$  are graphs on  $p$  vertices with Laplacians  $\mathbf{L}_1, \mathbf{L}_2$  then the Laplacian of their Kronecker product,  $H_1 \otimes H_2$ , is given by  $\mathbf{L} = \mathbf{L}_1 \otimes \mathbf{I}_p + \mathbf{I}_p \otimes \mathbf{L}_2$  ([28]). Hence, if  $\mathbf{v}_1, \mathbf{v}_2 \in \mathbb{R}^p$  are eigenvectors, viz.  $\mathbf{L}_1 \mathbf{v}_1 = \lambda_1 \mathbf{v}_1$  and  $\mathbf{L}_2 \mathbf{v}_2 = \lambda_2 \mathbf{v}_2$ , then  $\mathbf{L}(\mathbf{v}_1 \otimes \mathbf{v}_2) = (\lambda_1 + \lambda_2) \mathbf{v}_1 \otimes \mathbf{v}_2$ , where  $\mathbf{v}_1 \otimes \mathbf{v}_2$  is the usual tensor product. This completely characterizes the spectrum of Kronecker products of graphs.

We should argue the choice of  $\rho \propto p^{2k-\ell-1}$ , by showing that it is the results of cuts at level  $k$ . We say that an edge  $e = ((i_1, \dots, i_\ell), (j_1, \dots, j_\ell))$  has scale  $k$  if  $i_k \neq j_k$ .

Furthermore, a cut has scale  $k$  if each of its constituent edges has scale at least  $k$ . Each edge at scale  $k$  has weight  $p^{k-\ell}$  and there are  $p^{\ell-1}$  such edges, so cuts at scale  $k$  have total edge weight bounded by

$$p^{\ell-1} \sum_{i=1}^k p^{i-\ell} = p^{k-1} \frac{p - \frac{1}{p^{k-1}}}{p-1} \leq \frac{p^k}{p-1}$$

Cuts at scale  $k$  leave components of size  $p^{\ell-k}$  intact, meaning that  $\rho \propto p^{2k-\ell-1}$  for large enough  $p$ .

We now control the spectrum of the Kronecker graph. Let the eigenvalues of the base graph  $H$  be  $\{\nu_j\}_{j=1}^p$  in increasing order. The eigenvalues of  $G$  are precisely the sums

$$\lambda_i = \frac{1}{p^{\ell-1}} \nu_{i_1} + \frac{1}{p^{\ell-2}} \nu_{i_2} + \dots + \frac{1}{p} \nu_{i_{\ell-1}} + \nu_{i_\ell}$$

for  $i = (i_j)_{j=1}^\ell \subseteq [p]$ . The eigenvalue distribution  $\{\lambda_i\}$  stochastically bounds

$$\lambda_i \geq \sum_{j=1}^\ell \frac{1}{p^{\ell-j}} \nu_2 I\{\nu_{i_j} \neq 0\} \geq \frac{\nu_2}{p^{Z(i)}}$$

where  $Z(i) = \min\{j : \nu_{i_{\ell-j}} \neq 0\}$ . Notice that if  $i$  is chosen uniformly at random then  $Z(i)$  has a geometric distribution with probability of success  $(p-1)/p$ . Also  $\rho / (\frac{\nu_2}{p^{Z(i)}}) = p^{Z(i)+2k-\ell-1} / \nu_2 \geq 1$  if  $Z(i) \geq \ell + 1 - 2k + \log_p \nu_2$ , so

$$\begin{aligned} \frac{1}{p^\ell} \sum_{i \in [p]^\ell} \min\left\{1, \frac{\rho}{\lambda_i}\right\} &\leq \frac{p^{2k-\ell-1}}{\nu_2} \\ &+ \sum_{Z=1}^{\lfloor \ell+1-2k+\log_p \nu_2 \rfloor} \frac{p^{Z+2k-\ell-1}}{\nu_2} \frac{1}{p^Z} \frac{p-1}{p} \\ &\leq \frac{(\ell+2)p^{2k-\ell-1}}{\nu_2} \end{aligned}$$

This followed from the geometric probability mass function. We also know that the algebraic connectivity,  $\nu_2$ , is bounded from below by  $4p^{-2}$ , so the following result holds.

□

*Proof of Corollary 13 (b).* Similarly to the proof of Corollary 11 (b), we form  $\mathcal{C}'$  as the connected components of the graph with all the edges at coarseness less than  $k-2$ . So we have more than quadrupled the size of the clusters without increasing their cut size. Hence,  $|\mathcal{C}'| \asymp p^{k-2} \asymp n^{k/\ell} / p^2$ .

□
